# Supplementary material
Source: Springer Nature journal article supplement (https://www.springermedizin.de/resource/supplementary/12889_2013_5851_MOESM3_ESM.pdf/9496392)
Supplement: MOESM3 [file 9496392]

## ISCOLE NEIGHBORHOOD & HOME ENVIRONMENT QUESTIONNAIRE

Where "child" is mentioned, please respond only about the child who is participating in this study. Be as accurate as you can. There are no right or wrong answers. All information is strictly confidential.

### A. NEIGHBORHOOD COHESION

| Do you agree or disagree with the following statements?                                 | Strongly disagree     | Somewhat disagree     | Neutral               | Somewhat agree        | Strongly agree        |
|-----------------------------------------------------------------------------------------|-----------------------|-----------------------|-----------------------|-----------------------|-----------------------|
| 1. People around my neighborhood are willing to help their neighbors.                   | <input type="radio"/> | <input type="radio"/> | <input type="radio"/> | <input type="radio"/> | <input type="radio"/> |
| 2. This is a close-knit neighborhood.                                                   | <input type="radio"/> | <input type="radio"/> | <input type="radio"/> | <input type="radio"/> | <input type="radio"/> |
| 3. People in my neighborhood can be trusted.                                            | <input type="radio"/> | <input type="radio"/> | <input type="radio"/> | <input type="radio"/> | <input type="radio"/> |
| 4. People in my neighborhood generally <u>don't</u> get along with each other.          | <input type="radio"/> | <input type="radio"/> | <input type="radio"/> | <input type="radio"/> | <input type="radio"/> |
| 5. People in my neighborhood <u>do not</u> share the same values, attitudes or beliefs. | <input type="radio"/> | <input type="radio"/> | <input type="radio"/> | <input type="radio"/> | <input type="radio"/> |

### B. NEIGHBORS AND FRIENDS

1. Think about the neighborhood or area in which you live. In general, how well do you feel you know your neighbors?
- |                       |                       |                       |                       |
|-----------------------|-----------------------|-----------------------|-----------------------|
| Not at all            | Just a little         | Moderately well       | Extremely well        |
| <input type="radio"/> | <input type="radio"/> | <input type="radio"/> | <input type="radio"/> |
2. About how often do you talk to or visit with your immediate neighbors (people in the 10-20 households that live closest to you)?
- |                       |                       |                       |                       |                       |                       |                       |
|-----------------------|-----------------------|-----------------------|-----------------------|-----------------------|-----------------------|-----------------------|
| Never                 | Once a year or less   | Several times a year  | Once a month          | Several times a month | Several times a week  | Almost every day      |
| <input type="radio"/> | <input type="radio"/> | <input type="radio"/> | <input type="radio"/> | <input type="radio"/> | <input type="radio"/> | <input type="radio"/> |

### C. NEIGHBORHOOD RESPONSE

| For the following statements, please mark how likely a neighbor would respond to, or take action in the following situations:                                                                                                           | Very unlikely         | Unlikely              | Neither likely nor unlikely | Likely                | Very likely           |
|-----------------------------------------------------------------------------------------------------------------------------------------------------------------------------------------------------------------------------------------|-----------------------|-----------------------|-----------------------------|-----------------------|-----------------------|
| 1. If a group of neighborhood children were skipping school and hanging out on a street corner, how likely is it that your neighbors would do something about it?                                                                       | <input type="radio"/> | <input type="radio"/> | <input type="radio"/>       | <input type="radio"/> | <input type="radio"/> |
| 2. If some children were spray-painting graffiti on a local building, how likely is it that your neighbors would do something about it?                                                                                                 | <input type="radio"/> | <input type="radio"/> | <input type="radio"/>       | <input type="radio"/> | <input type="radio"/> |
| 3. If a child was showing disrespect to an adult, how likely is it that people in your neighborhood would scold that child?                                                                                                             | <input type="radio"/> | <input type="radio"/> | <input type="radio"/>       | <input type="radio"/> | <input type="radio"/> |
| 4. If there was a fight in front of your house and someone was being beaten or threatened, how likely is it that your neighbors would break it up?                                                                                      | <input type="radio"/> | <input type="radio"/> | <input type="radio"/>       | <input type="radio"/> | <input type="radio"/> |
| 5. Suppose that because of budget cuts the fire station closest to your home was going to be closed down by the city. How likely is it that neighborhood residents would organize to try to do something to keep the fire station open? | <input type="radio"/> | <input type="radio"/> | <input type="radio"/>       | <input type="radio"/> | <input type="radio"/> |

## D. FOODS IN THE HOME

How often are the following foods/drinks available in your home?

|                                            | Never                 | Rarely                | Sometimes             | Often                 | Always                |
|--------------------------------------------|-----------------------|-----------------------|-----------------------|-----------------------|-----------------------|
| 1. Chocolate candy                         | <input type="radio"/> | <input type="radio"/> | <input type="radio"/> | <input type="radio"/> | <input type="radio"/> |
| 2. Other candy                             | <input type="radio"/> | <input type="radio"/> | <input type="radio"/> | <input type="radio"/> | <input type="radio"/> |
| 3. Raw fruit (e.g., apples, oranges)       | <input type="radio"/> | <input type="radio"/> | <input type="radio"/> | <input type="radio"/> | <input type="radio"/> |
| 4. Cakes, brownies, muffins or cookies     | <input type="radio"/> | <input type="radio"/> | <input type="radio"/> | <input type="radio"/> | <input type="radio"/> |
| 5. Regular chips or crackers               | <input type="radio"/> | <input type="radio"/> | <input type="radio"/> | <input type="radio"/> | <input type="radio"/> |
| 6. Baked chips, low-fat crackers, pretzels | <input type="radio"/> | <input type="radio"/> | <input type="radio"/> | <input type="radio"/> | <input type="radio"/> |
| 7. Raw vegetables (e.g., carrots)          | <input type="radio"/> | <input type="radio"/> | <input type="radio"/> | <input type="radio"/> | <input type="radio"/> |
| 8. 100% fruit juice                        | <input type="radio"/> | <input type="radio"/> | <input type="radio"/> | <input type="radio"/> | <input type="radio"/> |
| 9. Juice drinks (e.g., Sunny delight)      | <input type="radio"/> | <input type="radio"/> | <input type="radio"/> | <input type="radio"/> | <input type="radio"/> |
| 10. Regular sodas with sugar               | <input type="radio"/> | <input type="radio"/> | <input type="radio"/> | <input type="radio"/> | <input type="radio"/> |
| 11. Diet or sugar free sodas               | <input type="radio"/> | <input type="radio"/> | <input type="radio"/> | <input type="radio"/> | <input type="radio"/> |
| 12. Sports drinks (e.g., Gatorade)         | <input type="radio"/> | <input type="radio"/> | <input type="radio"/> | <input type="radio"/> | <input type="radio"/> |
| 13. Fruit roll-ups or other dried fruit    | <input type="radio"/> | <input type="radio"/> | <input type="radio"/> | <input type="radio"/> | <input type="radio"/> |
| 14. Regular or 2% milk                     | <input type="radio"/> | <input type="radio"/> | <input type="radio"/> | <input type="radio"/> | <input type="radio"/> |
| 15. 1% or fat-free milk                    | <input type="radio"/> | <input type="radio"/> | <input type="radio"/> | <input type="radio"/> | <input type="radio"/> |
| 16. Sweetened breakfast cereal             | <input type="radio"/> | <input type="radio"/> | <input type="radio"/> | <input type="radio"/> | <input type="radio"/> |
| 17. Unsweetened breakfast cereal           | <input type="radio"/> | <input type="radio"/> | <input type="radio"/> | <input type="radio"/> | <input type="radio"/> |

## E. WHERE YOU SHOP

When you, or the main food shopper in your home, go food shopping, how often do you go to each of these types of stores?

|                                            | Never                 | Rarely                | Sometimes             | Often                 | Always                |
|--------------------------------------------|-----------------------|-----------------------|-----------------------|-----------------------|-----------------------|
| 1. Large supermarket or discount warehouse | <input type="radio"/> | <input type="radio"/> | <input type="radio"/> | <input type="radio"/> | <input type="radio"/> |
| 2. Small to medium food store              | <input type="radio"/> | <input type="radio"/> | <input type="radio"/> | <input type="radio"/> | <input type="radio"/> |
| 3. Convenience store                       | <input type="radio"/> | <input type="radio"/> | <input type="radio"/> | <input type="radio"/> | <input type="radio"/> |
| 4. Farmer's market/produce stand           | <input type="radio"/> | <input type="radio"/> | <input type="radio"/> | <input type="radio"/> | <input type="radio"/> |
| 5. Other, specify: _____                   | <input type="radio"/> | <input type="radio"/> | <input type="radio"/> | <input type="radio"/> | <input type="radio"/> |

## F. STORE ACCESS

Please indicate whether the following statements are true of the store where you usually buy groceries.

|                                       | Yes                   | No                    | Not applicable        |
|---------------------------------------|-----------------------|-----------------------|-----------------------|
| 1. Close to location of my employment | <input type="radio"/> | <input type="radio"/> | <input type="radio"/> |
| 2. Close to my child's school         | <input type="radio"/> | <input type="radio"/> | <input type="radio"/> |
| 3. Close to my home                   | <input type="radio"/> | <input type="radio"/> | <input type="radio"/> |

## G. FOOD SHOPPING

The following questions apply to the store where you usually buy groceries.

|                                                               | Strongly disagree     | Somewhat disagree     | Neutral               | Somewhat agree        | Strongly agree        |
|---------------------------------------------------------------|-----------------------|-----------------------|-----------------------|-----------------------|-----------------------|
| 1. Low-fat foods cost too much.                               | <input type="radio"/> | <input type="radio"/> | <input type="radio"/> | <input type="radio"/> | <input type="radio"/> |
| 2. There is a large selection of fresh fruits and vegetables. | <input type="radio"/> | <input type="radio"/> | <input type="radio"/> | <input type="radio"/> | <input type="radio"/> |
| 3. There is a large selection of low-fat products available.  | <input type="radio"/> | <input type="radio"/> | <input type="radio"/> | <input type="radio"/> | <input type="radio"/> |
| 4. The condition of fresh fruits and vegetables is poor.      | <input type="radio"/> | <input type="radio"/> | <input type="radio"/> | <input type="radio"/> | <input type="radio"/> |
| 5. Fruits and vegetables cost too much.                       | <input type="radio"/> | <input type="radio"/> | <input type="radio"/> | <input type="radio"/> | <input type="radio"/> |

## H. YOUR CHILD'S ELECTRONICS

Please indicate whether the following are in your child's bedroom.

Yes No

|                                                               |                       |                       |
|---------------------------------------------------------------|-----------------------|-----------------------|
| 1. TV                                                         | <input type="radio"/> | <input type="radio"/> |
| 2. Computer                                                   | <input type="radio"/> | <input type="radio"/> |
| 3. Video game system (non-hand held; Playstation, Xbox, etc.) | <input type="radio"/> | <input type="radio"/> |

Does your child have the following items for his/her own use?

|                                                           |                       |                       |
|-----------------------------------------------------------|-----------------------|-----------------------|
| 4. Cell phone or 2-way radio                              | <input type="radio"/> | <input type="radio"/> |
| 5. Hand-held videogame players (Game Boy, Sony PSP, etc.) | <input type="radio"/> | <input type="radio"/> |
| 6. Music systems (Ipod, stereo, radio, etc.)              | <input type="radio"/> | <input type="radio"/> |

For the next two questions, please think about your child's activities over the *past year*.

## I. PLAY EQUIPMENT

How often during the past year has your child used these items at or around home (or in a common apartment area)?

Not available (Don't have) Available but never use Once a month or less Once every other week Once a week or more

|                                                                  |                       |                       |                       |                       |                       |
|------------------------------------------------------------------|-----------------------|-----------------------|-----------------------|-----------------------|-----------------------|
| 1. Bike                                                          | <input type="radio"/> | <input type="radio"/> | <input type="radio"/> | <input type="radio"/> | <input type="radio"/> |
| 2. Basketball hoop                                               | <input type="radio"/> | <input type="radio"/> | <input type="radio"/> | <input type="radio"/> | <input type="radio"/> |
| 3. Jump rope                                                     | <input type="radio"/> | <input type="radio"/> | <input type="radio"/> | <input type="radio"/> | <input type="radio"/> |
| 4. Active video games (e.g., with dance pad, Wii, etc)           | <input type="radio"/> | <input type="radio"/> | <input type="radio"/> | <input type="radio"/> | <input type="radio"/> |
| 5. Sports equipment (like ball, racquets, bats, sticks)          | <input type="radio"/> | <input type="radio"/> | <input type="radio"/> | <input type="radio"/> | <input type="radio"/> |
| 6. Swimming pool                                                 | <input type="radio"/> | <input type="radio"/> | <input type="radio"/> | <input type="radio"/> | <input type="radio"/> |
| 7. Roller skates, skateboard, scooter                            | <input type="radio"/> | <input type="radio"/> | <input type="radio"/> | <input type="radio"/> | <input type="radio"/> |
| 8. Fixed play equipment (e.g., swing set, playhouse, jungle gym) | <input type="radio"/> | <input type="radio"/> | <input type="radio"/> | <input type="radio"/> | <input type="radio"/> |

## J. PLACES FOR YOUR CHILD'S PHYSICAL ACTIVITY

How often during the past year has your child been physically active (including active play) in the following places?

Never Once a month or less Once every other week Once a week 2 or 3 times/week 4 times/week or more

|                                                                                             |                       |                       |                       |                       |                       |                       |
|---------------------------------------------------------------------------------------------|-----------------------|-----------------------|-----------------------|-----------------------|-----------------------|-----------------------|
| 1. Inside your home                                                                         | <input type="radio"/> | <input type="radio"/> | <input type="radio"/> | <input type="radio"/> | <input type="radio"/> | <input type="radio"/> |
| 2. In your yard or common area or in your driveway                                          | <input type="radio"/> | <input type="radio"/> | <input type="radio"/> | <input type="radio"/> | <input type="radio"/> | <input type="radio"/> |
| 3. At a neighbor's house, yard, or driveway                                                 | <input type="radio"/> | <input type="radio"/> | <input type="radio"/> | <input type="radio"/> | <input type="radio"/> | <input type="radio"/> |
| 4. In a local street, sidewalk, or vacant lot/field                                         | <input type="radio"/> | <input type="radio"/> | <input type="radio"/> | <input type="radio"/> | <input type="radio"/> | <input type="radio"/> |
| 5. Indoor recreation or exercise facility (public or private; e.g., YMCA/Boys & Girls Club) | <input type="radio"/> | <input type="radio"/> | <input type="radio"/> | <input type="radio"/> | <input type="radio"/> | <input type="radio"/> |
| 6. Beach, lake, river, or creek                                                             | <input type="radio"/> | <input type="radio"/> | <input type="radio"/> | <input type="radio"/> | <input type="radio"/> | <input type="radio"/> |
| 7. Bike/hiking/walking trails, paths                                                        | <input type="radio"/> | <input type="radio"/> | <input type="radio"/> | <input type="radio"/> | <input type="radio"/> | <input type="radio"/> |
| 8. Basketball court                                                                         | <input type="radio"/> | <input type="radio"/> | <input type="radio"/> | <input type="radio"/> | <input type="radio"/> | <input type="radio"/> |
| 9. Other playing fields/courts (like football, softball, tennis)                            | <input type="radio"/> | <input type="radio"/> | <input type="radio"/> | <input type="radio"/> | <input type="radio"/> | <input type="radio"/> |
| 10. Small public park or playground                                                         | <input type="radio"/> | <input type="radio"/> | <input type="radio"/> | <input type="radio"/> | <input type="radio"/> | <input type="radio"/> |
| 11. Large public park                                                                       | <input type="radio"/> | <input type="radio"/> | <input type="radio"/> | <input type="radio"/> | <input type="radio"/> | <input type="radio"/> |
| 12. Public open space that is not a park                                                    | <input type="radio"/> | <input type="radio"/> | <input type="radio"/> | <input type="radio"/> | <input type="radio"/> | <input type="radio"/> |
| 13. School grounds (during non-school hours)                                                | <input type="radio"/> | <input type="radio"/> | <input type="radio"/> | <input type="radio"/> | <input type="radio"/> | <input type="radio"/> |

## K. GETTING AROUND IN YOUR NEIGHBORHOOD

Please select the answer that best applies to you and your neighborhood. Within walking distance means within a 10-15 minute walk from your home.

|                                                                                                                     | Strongly disagree     | Somewhat disagree     | Somewhat agree        | Strongly agree        |
|---------------------------------------------------------------------------------------------------------------------|-----------------------|-----------------------|-----------------------|-----------------------|
| 1. There are shops, stores, markets, and places to buy things I need within easy walking distance of my home/house. | <input type="radio"/> | <input type="radio"/> | <input type="radio"/> | <input type="radio"/> |
| 2. There is a bus, subway, or train stop within walking distance from my home.                                      | <input type="radio"/> | <input type="radio"/> | <input type="radio"/> | <input type="radio"/> |
| 3. There are sidewalks on most streets.                                                                             | <input type="radio"/> | <input type="radio"/> | <input type="radio"/> | <input type="radio"/> |
| 4. There are NOT many dead end streets.                                                                             | <input type="radio"/> | <input type="radio"/> | <input type="radio"/> | <input type="radio"/> |
| 5. There are many different routes for getting from place to place.                                                 | <input type="radio"/> | <input type="radio"/> | <input type="radio"/> | <input type="radio"/> |
| 6. There is a high crime rate.                                                                                      | <input type="radio"/> | <input type="radio"/> | <input type="radio"/> | <input type="radio"/> |
| 7. The speed of traffic on most streets is usually slow (30 mph or less).                                           | <input type="radio"/> | <input type="radio"/> | <input type="radio"/> | <input type="radio"/> |
| 8. Most drivers go faster than the posted speed limits.                                                             | <input type="radio"/> | <input type="radio"/> | <input type="radio"/> | <input type="radio"/> |
| 9. There are many interesting things to look at while walking in my neighborhood.                                   | <input type="radio"/> | <input type="radio"/> | <input type="radio"/> | <input type="radio"/> |
| 10. The traffic makes it difficult or unpleasant for my child to walk.                                              | <input type="radio"/> | <input type="radio"/> | <input type="radio"/> | <input type="radio"/> |
| 11. Streets have good lighting at night.                                                                            | <input type="radio"/> | <input type="radio"/> | <input type="radio"/> | <input type="radio"/> |
| 12. There are crosswalks and signals on busy streets.                                                               | <input type="radio"/> | <input type="radio"/> | <input type="radio"/> | <input type="radio"/> |
| 13. There are many places to go within easy walking distance of my home.                                            | <input type="radio"/> | <input type="radio"/> | <input type="radio"/> | <input type="radio"/> |
| 14. I'm afraid of my child being taken or hurt by a stranger on local streets.                                      | <input type="radio"/> | <input type="radio"/> | <input type="radio"/> | <input type="radio"/> |
| 15. I'm afraid of my child being taken or hurt by a stranger in my yard, driveway, or common area.                  | <input type="radio"/> | <input type="radio"/> | <input type="radio"/> | <input type="radio"/> |
| 16. I'm afraid of my child being taken or hurt by a stranger in a local park.                                       | <input type="radio"/> | <input type="radio"/> | <input type="radio"/> | <input type="radio"/> |
| 17. I'm afraid of my child being taken or hurt by a known "bad" person (adult or child) in my neighborhood.         | <input type="radio"/> | <input type="radio"/> | <input type="radio"/> | <input type="radio"/> |

## L. DISTANCE TO LOCATIONS

About how long would it take you to walk from your home to the nearest places listed below? Please select the time it would take you to walk to each place, regardless of whether you/your child go there.

|                                                                                             | 1-5 min               | 6-10 min              | 11-20 min             | 21-30 min             | 31+ min               | Don't know            |
|---------------------------------------------------------------------------------------------|-----------------------|-----------------------|-----------------------|-----------------------|-----------------------|-----------------------|
| 1. Convenience/corner store/small grocery store/bodega                                      | <input type="radio"/> | <input type="radio"/> | <input type="radio"/> | <input type="radio"/> | <input type="radio"/> | <input type="radio"/> |
| 2. Supermarket                                                                              | <input type="radio"/> | <input type="radio"/> | <input type="radio"/> | <input type="radio"/> | <input type="radio"/> | <input type="radio"/> |
| 3. Fast food restaurant                                                                     | <input type="radio"/> | <input type="radio"/> | <input type="radio"/> | <input type="radio"/> | <input type="radio"/> | <input type="radio"/> |
| 4. Non-fast food restaurant                                                                 | <input type="radio"/> | <input type="radio"/> | <input type="radio"/> | <input type="radio"/> | <input type="radio"/> | <input type="radio"/> |
| 5. Indoor recreation or exercise facility (public or private; e.g., YMCA/Boys & Girls Club) | <input type="radio"/> | <input type="radio"/> | <input type="radio"/> | <input type="radio"/> | <input type="radio"/> | <input type="radio"/> |
| 6. Beach, lake, river, or creek                                                             | <input type="radio"/> | <input type="radio"/> | <input type="radio"/> | <input type="radio"/> | <input type="radio"/> | <input type="radio"/> |
| 7. Bike/hiking/walking trails, paths                                                        | <input type="radio"/> | <input type="radio"/> | <input type="radio"/> | <input type="radio"/> | <input type="radio"/> | <input type="radio"/> |
| 8. Basketball court (including half-court)                                                  | <input type="radio"/> | <input type="radio"/> | <input type="radio"/> | <input type="radio"/> | <input type="radio"/> | <input type="radio"/> |
| 9. Other playing fields/courts (like soccer, football, softball, tennis, skate park, etc.)  | <input type="radio"/> | <input type="radio"/> | <input type="radio"/> | <input type="radio"/> | <input type="radio"/> | <input type="radio"/> |
| 10. Small public park                                                                       | <input type="radio"/> | <input type="radio"/> | <input type="radio"/> | <input type="radio"/> | <input type="radio"/> | <input type="radio"/> |
| 11. Large public park                                                                       | <input type="radio"/> | <input type="radio"/> | <input type="radio"/> | <input type="radio"/> | <input type="radio"/> | <input type="radio"/> |
| 12. Public playground with equipment                                                        | <input type="radio"/> | <input type="radio"/> | <input type="radio"/> | <input type="radio"/> | <input type="radio"/> | <input type="radio"/> |
| 13. School with recreation facilities open to the public                                    | <input type="radio"/> | <input type="radio"/> | <input type="radio"/> | <input type="radio"/> | <input type="radio"/> | <input type="radio"/> |

**M. FAMILY**

**During a typical week, how often do you or another adult in the household:**

|                                                                                          | Never                 | 1-2 days              | 3-4 days              | 5-6 days              | Every day             |
|------------------------------------------------------------------------------------------|-----------------------|-----------------------|-----------------------|-----------------------|-----------------------|
| 1. Watch your child participate in physical activity or sports                           | <input type="radio"/> | <input type="radio"/> | <input type="radio"/> | <input type="radio"/> | <input type="radio"/> |
| 2. Encourage your child to do sports or physical activity                                | <input type="radio"/> | <input type="radio"/> | <input type="radio"/> | <input type="radio"/> | <input type="radio"/> |
| 3. Provide transport to a place where your child can do physical activity or play sports | <input type="radio"/> | <input type="radio"/> | <input type="radio"/> | <input type="radio"/> | <input type="radio"/> |
| 4. Do a physical activity or play sports with your child                                 | <input type="radio"/> | <input type="radio"/> | <input type="radio"/> | <input type="radio"/> | <input type="radio"/> |
